# Supplementary material
Source: Springer Nature journal article supplement (https://www.springermedizin.de/resource/supplementary/12885_2013_3899_MOESM3_ESM.pdf/9464696)

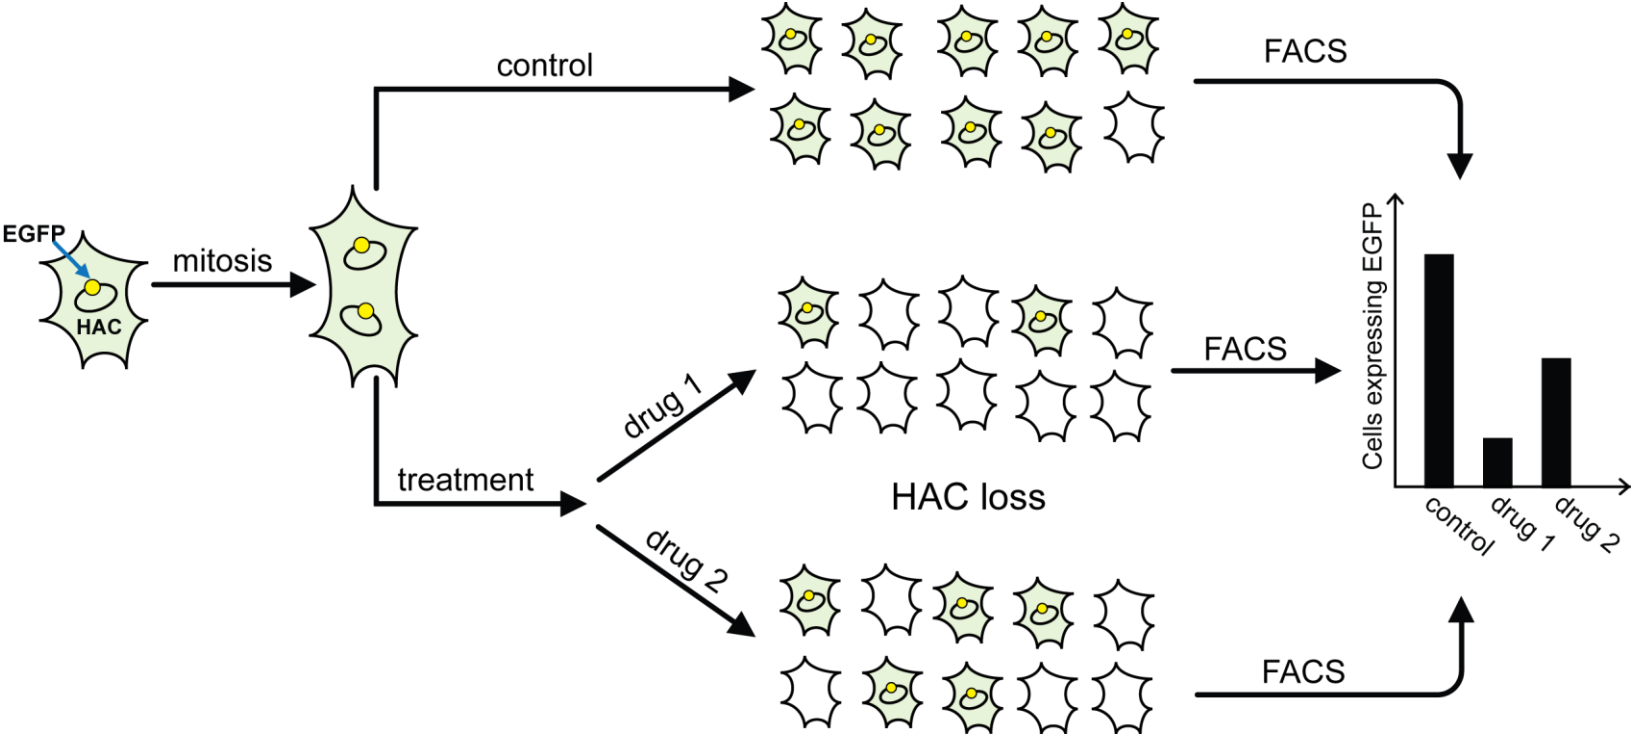

Supplement: MOESM3 [file 9464696]
